# Supplementary material for: Morphological variation in a secondary contact between divergent lineages of brown trout (Salmo trutta) from the Iberian Peninsula
Source: PubMed Central journal article supplement (PMC3032971; doi:10.1590/s1415-47572009005000014), 2009-01-16
Supplement: gmb-32-1-42-suppl1.pdf [file gmb-32-1-42-suppl1.pdf]

**Table S1** - Number of individuals, mean, variance, standard deviation and range for the 12 morphometric and 4 meristic traits analysed in the 9 samples from the Duero basin. The two Lower-course (AG1 and AG2) and Pisuerga (P1 and P2) populations were pooled in a single Lower-course (AG) and Pisuerga (P) sample (see Material and Methods).

| Sample | Statistics | Trait           |            |            |                       |              |            |            |             |            |
|--------|------------|-----------------|------------|------------|-----------------------|--------------|------------|------------|-------------|------------|
|        |            | Standard Length | Body depth | Body width | Caudal peduncle depth | Eye diameter | Gape width | Head depth | Head length | Jaw length |
| AG     | N          | 101             | 101        | 101        | 101                   | 101          | 101        | 101        | 101         | 101        |
|        | Mean       | 109.8           | 24.0       | 12.8       | 10.7                  | 7.6          | 9.7        | 14.3       | 29.2        | 14.2       |
|        | S.D.       | 42.3            | 9.7        | 5.1        | 4.0                   | 2.0          | 4.1        | 5.3        | 11.4        | 6.1        |
|        | Variance   | 1791.2          | 93.5       | 25.9       | 16.0                  | 4.0          | 16.9       | 27.7       | 129.9       | 36.9       |
|        | Minimum    | 49.3            | 10.8       | 5.5        | 5.0                   | 4.4          | 4.1        | 6.9        | 12.8        | 6.0        |
|        | Maximum    | 205.5           | 47.2       | 25.8       | 20.2                  | 11.4         | 21.3       | 27.2       | 56.3        | 29.2       |
| CA     | N          | 41              | 41         | 41         | 41                    | 41           | 41         | 41         | 41          | 41         |
|        | Mean       | 129.6           | 28.3       | 15.4       | 11.9                  | 7.3          | 11.5       | 15.3       | 31.6        | 14.2       |
|        | S.D.       | 79.4            | 18.0       | 9.2        | 7.4                   | 3.5          | 7.2        | 8.5        | 18.5        | 8.9        |
|        | Variance   | 6309.8          | 325.5      | 84.5       | 55.5                  | 12.0         | 51.5       | 72.5       | 342.6       | 78.3       |
|        | Minimum    | 46.7            | 9.1        | 5.4        | 4.2                   | 3.4          | 4.2        | 6.3        | 12.3        | 5.0        |
|        | Maximum    | 245.2           | 59.1       | 29.5       | 22.9                  | 12.1         | 25.6       | 30.5       | 59.9        | 30.3       |
| CE     | N          | 51              | 51         | 51         | 51                    | 51           | 51         | 51         | 51          | 51         |
|        | Mean       | 116.4           | 27.2       | 14.3       | 11.8                  | 7.3          | 10.7       | 14.6       | 29.2        | 13.4       |
|        | S.D.       | 39.3            | 9.8        | 5.1        | 3.9                   | 1.7          | 3.8        | 4.5        | 9.3         | 4.7        |
|        | Variance   | 1545.1          | 96.0       | 25.9       | 15.4                  | 3.0          | 14.5       | 20.0       | 85.9        | 21.9       |
|        | Minimum    | 51.4            | 10.6       | 6.6        | 5.1                   | 4.2          | 5.1        | 6.7        | 13.6        | 5.6        |
|        | Maximum    | 196.5           | 47.6       | 24.8       | 19.1                  | 10.5         | 18.8       | 23.1       | 48.2        | 23.8       |
| RI     | N          | 40              | 40         | 40         | 40                    | 40           | 40         | 40         | 40          | 40         |
|        | Mean       | 62.2            | 11.8       | 6.6        | 5.6                   | 5.2          | 5.4        | 8.3        | 16.8        | 7.4        |
|        | S.D.       | 14.4            | 3.1        | 1.6        | 1.3                   | 0.8          | 1.1        | 1.6        | 3.3         | 1.6        |
|        | Variance   | 207.2           | 9.4        | 2.5        | 1.8                   | 0.7          | 1.3        | 2.5        | 10.6        | 2.6        |
|        | Minimum    | 43.8            | 7.6        | 4.0        | 4.0                   | 3.9          | 3.9        | 5.8        | 12.7        | 5.0        |
|        | Maximum    | 101.1           | 19.7       | 10.4       | 9.1                   | 7.1          | 8.7        | 12.1       | 25.6        | 11.3       |
| TO     | N          | 52              | 52         | 52         | 52                    | 52           | 52         | 52         | 52          | 52         |
|        | Mean       | 126.1           | 25.8       | 14.4       | 12.2                  | 8.5          | 10.7       | 16.1       | 32.2        | 14.5       |
|        | S.D.       | 30.0            | 6.3        | 3.6        | 3.0                   | 1.4          | 2.8        | 3.6        | 7.2         | 3.6        |
|        | Variance   | 898.5           | 40.3       | 12.6       | 9.2                   | 2.0          | 8.0        | 13.1       | 52.0        | 13.1       |
|        | Minimum    | 84.0            | 16.5       | 9.7        | 7.7                   | 6.7          | 7.2        | 11.4       | 22.4        | 9.9        |
|        | Maximum    | 208.7           | 40.7       | 23.2       | 19.1                  | 11.5         | 18.7       | 25.6       | 49.5        | 23.0       |

| Sample | Statistics | Trait                           |                             |                         |                        |      |                  |                |            |           |
|--------|------------|---------------------------------|-----------------------------|-------------------------|------------------------|------|------------------|----------------|------------|-----------|
|        |            | Pectoral-pelvic<br>fin distance | Pelvic-anal<br>fin distance | Postorbital<br>distance | Preorbital<br>distance |      | Pectoral<br>rays | Pelvic<br>rays | Gillrakers | Vertebrae |
| ES     | N          | 50                              | 50                          | 50                      | 50                     | 50   | 50               | 50             | 50         | 50        |
|        | Mean       | 160.7                           | 37.4                        | 19.7                    | 15.9                   | 8.9  | 13.5             | 19.3           | 38.8       | 17.1      |
|        | S.D.       | 45.3                            | 10.9                        | 5.5                     | 4.4                    | 1.7  | 3.8              | 4.6            | 9.9        | 4.6       |
|        | Variance   | 2047.9                          | 119.2                       | 30.7                    | 19.1                   | 2.9  | 14.4             | 21.3           | 98.2       | 21.5      |
|        | Minimum    | 84.2                            | 18.3                        | 10.3                    | 8.2                    | 5.6  | 8.1              | 12.6           | 21.3       | 9.1       |
|        | Maximum    | 247.5                           | 57.8                        | 30.3                    | 24.6                   | 12.5 | 21.2             | 30.0           | 57.1       | 26.6      |
| OM     | N          | 46                              | 46                          | 46                      | 46                     | 46   | 46               | 46             | 46         | 46        |
|        | Mean       | 129.1                           | 27.2                        | 14.5                    | 12.5                   | 7.8  | 10.2             | 14.9           | 30.6       | 13.7      |
|        | S.D.       | 40.7                            | 9.9                         | 4.8                     | 4.1                    | 1.5  | 3.2              | 3.8            | 8.5        | 4.0       |
|        | Variance   | 1656.1                          | 98.0                        | 23.4                    | 16.6                   | 2.3  | 10.2             | 14.7           | 72.2       | 15.8      |
|        | Minimum    | 58.1                            | 10.8                        | 6.7                     | 5.2                    | 4.7  | 4.5              | 7.8            | 14.9       | 6.3       |
|        | Maximum    | 236.5                           | 53.6                        | 27.8                    | 22.6                   | 11.4 | 19.0             | 24.9           | 51.2       | 23,5      |
| NE     | N          | 34                              | 34                          | 34                      | 34                     | 34   | 34               | 34             | 34         | 34        |
|        | Mean       | 156.3                           | 33.9                        | 17.4                    | 15.3                   | 10.1 | 13.4             | 18.3           | 40.2       | 18,4      |
|        | S.D.       | 35.7                            | 8.6                         | 4.1                     | 3.8                    | 1.9  | 3.9              | 4.1            | 9.4        | 4,8       |
|        | Variance   | 1271.9                          | 73.5                        | 16.5                    | 14.3                   | 3.5  | 15.1             | 17.1           | 88.9       | 23,4      |
|        | Minimum    | 93.6                            | 19.0                        | 10.0                    | 8.9                    | 6.5  | 6.6              | 10.3           | 23.0       | 9,9       |
|        | Maximum    | 225.5                           | 52.7                        | 26.4                    | 23.6                   | 13.8 | 21.6             | 27.5           | 61.9       | 30,1      |
| P      | N          | 101                             | 101                         | 101                     | 101                    | 101  | 101              | 101            | 101        | 101       |
|        | Mean       | 136.8                           | 27.9                        | 14.9                    | 12.6                   | 8.3  | 11.1             | 16.0           | 34.1       | 15,9      |
|        | S.D.       | 27.3                            | 6.3                         | 3.1                     | 2.5                    | 1.2  | 2.3              | 2.8            | 6.4        | 3,4       |
|        | Variance   | 746.0                           | 39.4                        | 9.9                     | 6.4                    | 1.4  | 5.1              | 7.9            | 40.7       | 11,6      |
|        | Minimum    | 67.3                            | 12.6                        | 7.0                     | 6.2                    | 5.0  | 5.7              | 8.3            | 17.1       | 7,3       |
|        | Maximum    | 210.3                           | 44.6                        | 22.9                    | 18.6                   | 11.1 | 17.3             | 22.9           | 49.3       | 24,9      |
| AG     | N          | 101                             | 101                         | 101                     | 101                    | 101  | 101              | 101            | 101        | 101       |
|        | Mean       | 34.4                            | 22.5                        | 15.5                    | 6.9                    | 12.8 | 9.0              | 21.7           | 57.1       |           |
|        | S.D.       | 14.2                            | 8.3                         | 6.4                     | 3.2                    | 0.5  | 0.2              | 1.5            | 0.7        |           |
|        | Variance   | 202.6                           | 69.1                        | 40.5                    | 10.3                   | 0.2  | 0.0              | 2.2            | 0.5        |           |
|        | Minimum    | 14.0                            | 9.4                         | 6.6                     | 2.4                    | 12.0 | 8.5              | 10.5           | 55.0       |           |
|        | Maximum    | 69.9                            | 40.2                        | 30.6                    | 15.8                   | 14.0 | 9.5              | 24.0           | 59.0       |           |
| CA     | N          | 41                              | 41                          | 41                      | 41                     | 41   | 41               | 41             | 41         | 41        |
|        | Mean       | 41.2                            | 26.0                        | 17.2                    | 8.0                    | 13.2 | 9.0              | 22.0           | 58.5       |           |
|        | S.D.       | 25.5                            | 16.5                        | 10.4                    | 5.4                    | 0.4  | 0.2              | 1.1            | 0.5        |           |
|        | Variance   | 651.2                           | 270.9                       | 107.5                   | 29.1                   | 0.2  | 0.0              | 1.1            | 0.3        |           |

| Sample | Statistics | Trait                           |                             |                         |                        |                  |                |            |           |
|--------|------------|---------------------------------|-----------------------------|-------------------------|------------------------|------------------|----------------|------------|-----------|
|        |            | Pectoral-pelvic<br>fin distance | Pelvic-anal<br>fin distance | Postorbital<br>distance | Preorbital<br>distance | Pectoral<br>rays | Pelvic<br>rays | Gillrakers | Vertebrae |
| CE     | Minimum    | 15.0                            | 8.7                         | 6.7                     | 2.2                    | 12.5             | 8.5            | 20.0       | 58.0      |
|        | Maximum    | 77.1                            | 51.2                        | 33.5                    | 18.8                   | 14.0             | 9.0            | 24.0       | 59.0      |
|        | N          | 51                              | 51                          | 51                      | 51                     | 51               | 51             | 51         | 51        |
|        | Mean       | 37.0                            | 24.3                        | 16.0                    | 6.6                    | 13.4             | 9.1            | 21.6       | 58.1      |
|        | S.D.       | 13.4                            | 8.7                         | 5.5                     | 2.4                    | 0.5              | 0.3            | 1.1        | 0.8       |
|        | Variance   | 179.9                           | 75.8                        | 30.3                    | 5.7                    | 0.3              | 0.1            | 1.2        | 0.7       |
| RI     | Minimum    | 16.2                            | 9.6                         | 6.8                     | 3.0                    | 12.0             | 8.5            | 19.0       | 56.0      |
|        | Maximum    | 64.4                            | 44.0                        | 28.6                    | 12.2                   | 14.0             | 10.0           | 24.0       | 60.0      |
|        | N          | 40                              | 40                          | 40                      | 40                     | 40               | 39             | 40         | 40        |
|        | Mean       | 18.9                            | 12.6                        | 8.6                     | 4.0                    | 13.1             | 8.9            | 22.1       | 58.0      |
|        | S.D.       | 4.3                             | 3.5                         | 1.8                     | 0.9                    | 0.4              | 0.2            | 0.9        | 0.7       |
|        | Variance   | 18.4                            | 12.1                        | 3.2                     | 0.8                    | 0.2              | 0.0            | 0.9        | 0.5       |
| TO     | Minimum    | 13.8                            | 7.3                         | 6.3                     | 2.9                    | 12.0             | 8.0            | 20.0       | 56.0      |
|        | Maximum    | 31.0                            | 22.0                        | 14.0                    | 6.3                    | 14.0             | 9.5            | 24.0       | 59.0      |
|        | N          | 52                              | 52                          | 52                      | 52                     | 52               | 52             | 52         | 52        |
|        | Mean       | 40.4                            | 26.4                        | 17.1                    | 7.5                    | 13.0             | 9.0            | 22.5       | 58.1      |
|        | S.D.       | 9.9                             | 6.7                         | 4.3                     | 1.9                    | 0.4              | 0.1            | 1.2        | 0.6       |
|        | Variance   | 98.2                            | 44.9                        | 18.7                    | 3.5                    | 0.1              | 0.0            | 1.3        | 0.4       |
| ES     | Minimum    | 27.2                            | 17.6                        | 11.1                    | 5.3                    | 12.0             | 9.0            | 20.0       | 57.0      |
|        | Maximum    | 66.9                            | 47.7                        | 28.1                    | 12.0                   | 14.0             | 9.5            | 26.0       | 59.0      |
|        | N          | 50                              | 50                          | 50                      | 50                     | 50               | 50             | 50         | 50        |
|        | Mean       | 49.5                            | 34.4                        | 21.6                    | 9.4                    | 13.4             | 9.0            | 23.0       | 57.5      |
|        | S.D.       | 14.3                            | 10.3                        | 5.9                     | 2.7                    | 0.6              | 0.1            | 1.2        | 1.0       |
|        | Variance   | 205.2                           | 105.2                       | 34.6                    | 7.4                    | 0.3              | 0.0            | 1.5        | 0.9       |
| OM     | Minimum    | 25.8                            | 16.1                        | 11.7                    | 4.6                    | 12.0             | 9.0            | 21.0       | 53.0      |
|        | Maximum    | 78.7                            | 53.6                        | 34.0                    | 16.4                   | 14.0             | 10.0           | 25.5       | 59.0      |
|        | N          | 46                              | 46                          | 46                      | 46                     | 46               | 46             | 46         | 46        |
|        | Mean       | 40.1                            | 27.7                        | 16.6                    | 7.3                    | 13.3             | 9.0            | 22.4       | 57.6      |
|        | S.D.       | 13.4                            | 9.0                         | 5.1                     | 2.3                    | 0.5              | 0.1            | 1.1        | 0.5       |
|        | Variance   | 180.8                           | 81.5                        | 25.8                    | 5.1                    | 0.2              | 0.0            | 1.3        | 0.3       |
|        | Minimum    | 17.9                            | 11.8                        | 7.2                     | 3.1                    | 12.0             | 9.0            | 19.0       | 57.0      |
|        | Maximum    | 79.5                            | 51.8                        | 29.2                    | 12.9                   | 14.0             | 9.5            | 24.5       | 59.0      |

| Sample | Statistics | Trait                           |                             |                         |                        |                  |                |            |           |
|--------|------------|---------------------------------|-----------------------------|-------------------------|------------------------|------------------|----------------|------------|-----------|
|        |            | Pectoral-pelvic<br>fin distance | Pelvic-anal<br>fin distance | Postorbital<br>distance | Preorbital<br>distance | Pectoral<br>rays | Pelvic<br>rays | Gillrakers | Vertebrae |
| NE     | N          | 34                              | 34                          | 34                      | 34                     | 34               | 34             | 34         | 34        |
|        | Mean       | 48.6                            | 33.8                        | 21.8                    | 9.1                    | 13.5             | 9.0            | 22.7       | 57.7      |
|        | S.D.       | 11,3                            | 7.5                         | 5.4                     | 2.3                    | 0.5              | 0.2            | 1.0        | 0.8       |
|        | Variance   | 126,6                           | 55.8                        | 29.4                    | 5.4                    | 0.3              | 0.0            | 0.9        | 0.6       |
|        | Minimum    | 28.6                            | 20.4                        | 11.8                    | 5.4                    | 12.5             | 9.0            | 21.0       | 56.0      |
|        | Maximum    | 70,7                            | 51.4                        | 34.5                    | 15.0                   | 14,5             | 10.0           | 25.0       | 59.0      |
| P      | N          | 101                             | 101                         | 101                     | 101                    | 101              | 101            | 101        | 101       |
|        | Mean       | 43.3                            | 27,2                        | 18.3                    | 8.0                    | 13.8             | 9.0            | 23.6       | 57.6      |
|        | S.D.       | 9,0                             | 6.0                         | 3.6                     | 1.9                    | 0.4              | 0.2            | 1.3        | 0.7       |
|        | Variance   | 80.5                            | 36,1                        | 13.2                    | 3.5                    | 0.1              | 0.0            | 1.7        | 0.4       |
|        | Minimum    | 22,3                            | 11.7                        | 9.2                     | 3.7                    | 13.0             | 8.0            | 20.5       | 56.0      |
|        | Maximum    | 69.2                            | 47.9                        | 27.6                    | 12.9                   | 14.5             | 10.0           | 26.5       | 59.0      |
